# Supplementary material for: Psychological Support System for Hospital Workers During the Covid-19 Outbreak: Rapid Design and Implementation of the Covid-Psy Hotline
Source: PubMed Central journal article supplement (PMC7326137; doi:10.3389/fpsyt.2020.00511), 2020-05-28

**Figure S1.** Distribution of hospitals calling the Covid-Psy hotline from the Assistance Publique – Hôpitaux de Paris (APHP) [number of calls and %]

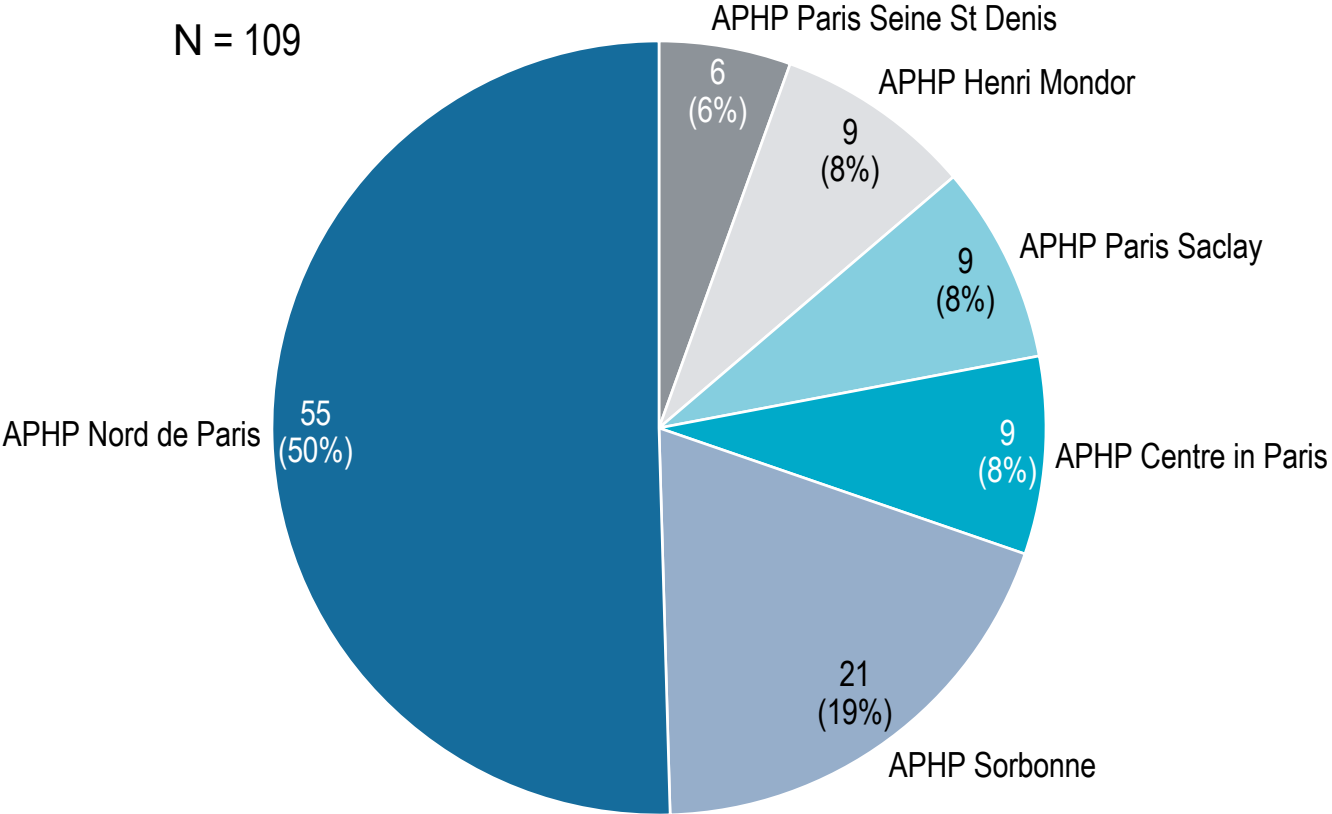

Supplement: Image_1.pdf [file Image_1.pdf]
